# Supplementary material for: Oleoylethanolamide and Palmitoylethanolamide Enhance IFNβ-Induced Apoptosis in Human Neuroblastoma SH-SY5Y Cells
Source: MDPI journal article supplement (doi:10.3390/molecules29071592), 2024-04-02
Supplement: s1 [file s1]

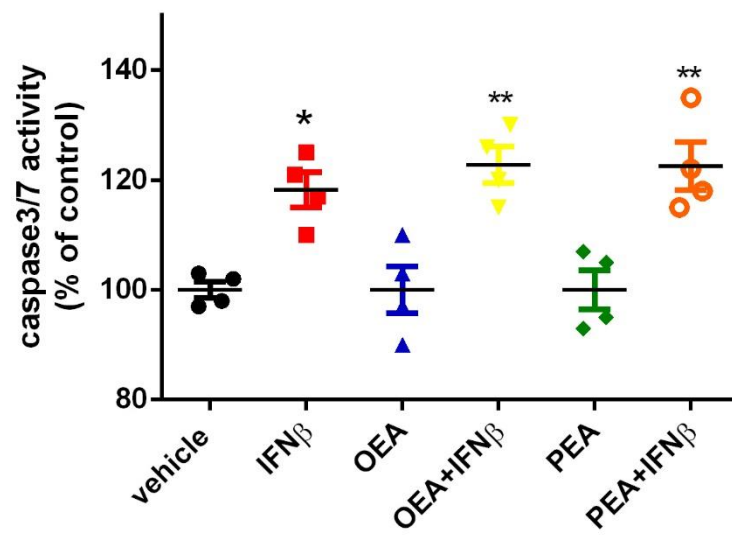

**Figure S1.** Cells were exposed for 6 hours to OEA and PEA (3  $\mu$ M) and then to IFN $\beta$  (5 ng/ml) for 12 hours and were subjected to caspase 3/7 activity. The values are expressed as percent of control (vehicle). \* $p$  < 0.05 and \*\* $p$  < 0.01 *versus* vehicle-treated cells. The results are represented as mean  $\pm$  SEM of four independent experiments.
